# Supplementary material for: Leptin modulated microRNA-628-5p targets Jagged-1 and inhibits prostate cancer hallmarks
Source: PubMed Central journal article supplement (PMC9203512; doi:10.1038/s41598-022-13279-x), 2022-06-16

# Figure 1S

## Leptin modulated microRNA-628-5p targets Jagged-1 and inhibits prostate cancer hallmarks

Leslimar Rios-Colon<sup>1,2\*</sup>, Juliet Chijioke<sup>1\*</sup>, Suryakant Niture<sup>1</sup>, Zainab Afzal<sup>1</sup>, Qi Qi<sup>1</sup>, Anvesha Srivastava<sup>1</sup>, Malathi Ramalinga<sup>1</sup>, Habib Kedir<sup>1</sup>, Patrice Cagle<sup>1</sup>, Elena Arthur<sup>1</sup>, Mitu Sharma<sup>2</sup>, John Moore<sup>1</sup>, Gagan Deep<sup>2,3,4</sup>, Simeng Suy<sup>5</sup>, Sean P Collins<sup>5</sup>, and Deepak Kumar<sup>1\*\*</sup>

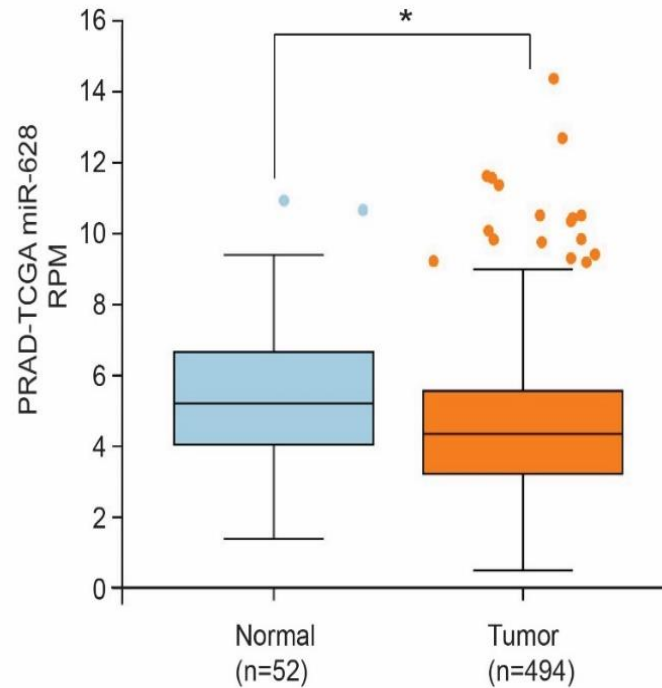

Supplement: 41598_2022_13279_MOESM1_ESM.pdf [file 41598_2022_13279_MOESM1_ESM.pdf]
