# Supplementary material for: Leptin modulated microRNA-628-5p targets Jagged-1 and inhibits prostate cancer hallmarks
Source: PubMed Central journal article supplement (PMC9203512; doi:10.1038/s41598-022-13279-x), 2022-06-16
Supplement: 41598_2022_13279_MOESM4_ESM.pdf [file 41598_2022_13279_MOESM4_ESM.pdf]

# **Leptin modulated microRNA-628-5p targets Jagged-1 and inhibits prostate cancer hallmarks**

Leslimar Rios-Colon<sup>1,2\*</sup>, Juliet Chijioko<sup>1\*</sup>, Suryakant Niture<sup>1</sup>, Zainab Afzal<sup>1</sup>, Qi Qi<sup>1</sup>, Anvesha Srivastava<sup>1</sup>, Malathi Ramalinga<sup>1</sup>, Habib Kedir<sup>1</sup>, Patrice Cagle<sup>1</sup>, Elena Arthur<sup>1</sup>, Mitu Sharma<sup>2</sup>, John Moore<sup>1</sup>, Gagan Deep<sup>2,3,4</sup>, Simeng Suy<sup>5</sup>, Sean P Collins<sup>5</sup>, and Deepak Kumar<sup>1\*\*</sup>

<sup>1</sup>Julius L. Chambers Biomedical Biotechnology Research Institute, North Carolina Central University, Durham, North Carolina NC; <sup>2</sup>Wake Forest University Health Sciences, Winston-Salem, NC, <sup>3</sup>Wake Forest Baptist Comprehensive Cancer Center, North Carolina; <sup>4</sup>Department of Urology, Wake Forest School of Medicine, Winston-Salem, North Carolina, <sup>5</sup>Lombardi Comprehensive Cancer Center, Georgetown University, Washington

**Supplementary materials**  
**Western blots**

Figure 4

C

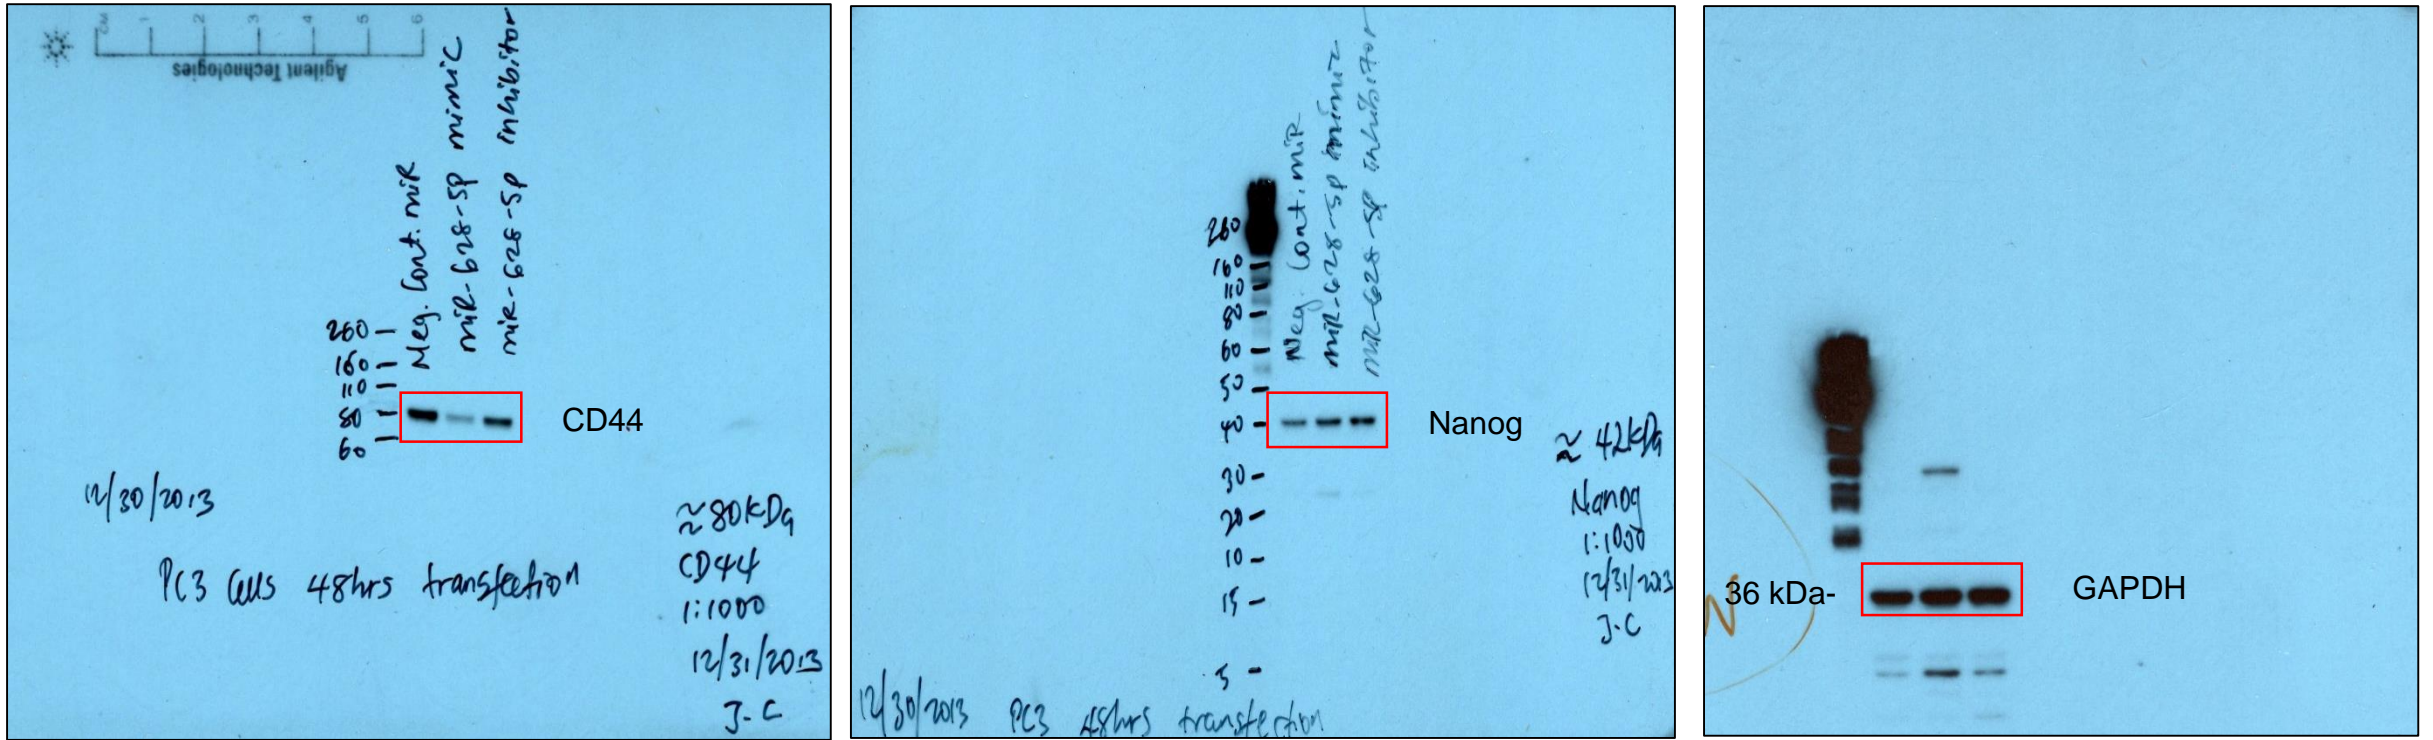

Full length images of blots for Fig. 4C in main paper. Red rectangles indicate the regions used in the figures. PVDF membranes were used for probing with the respective primary antibody. Film was utilized to develop membranes.

**Figure 5**

**B**

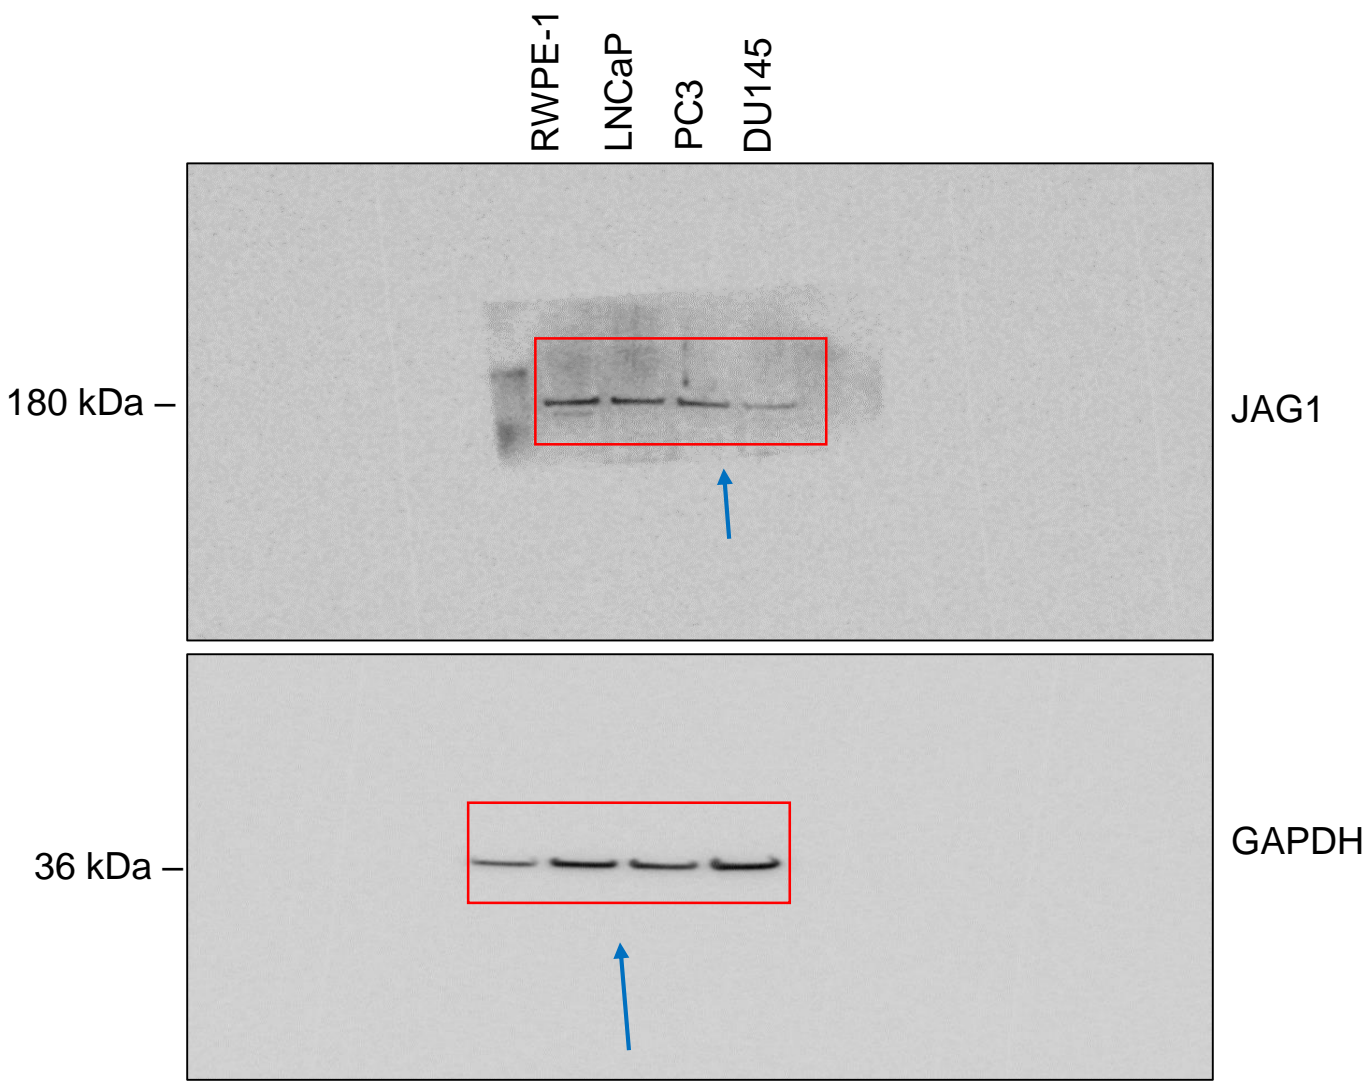

\*\* membrane was cut previous to probing using molecular weight marker as reference. Edges are marked with blue arrow when possible. The Azure c500 was used to scan membranes.

Full length images of blots for Fig. 5B in main paper. Red rectangles indicate the regions used in the figures. PVDF membranes were cut where indicated using molecular weight marker as reference, and used for probing with the respective primary antibody.



Figure 5

E

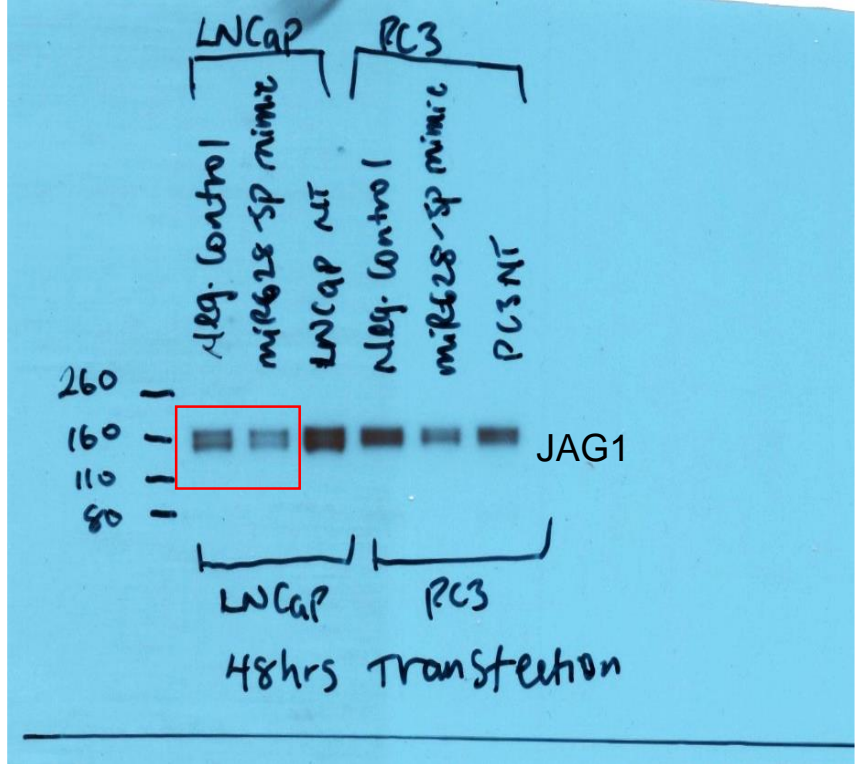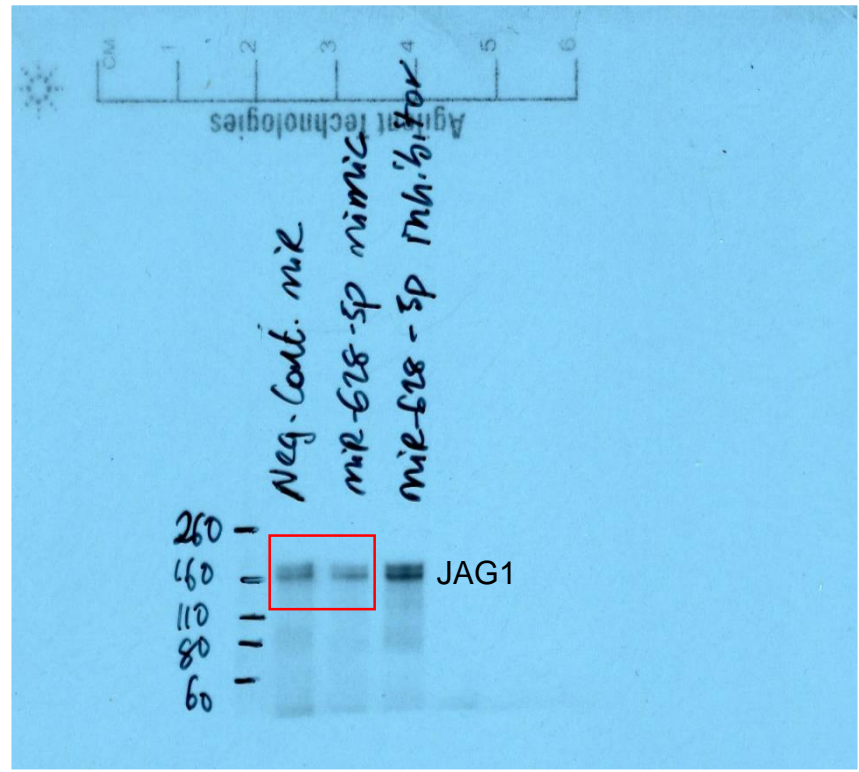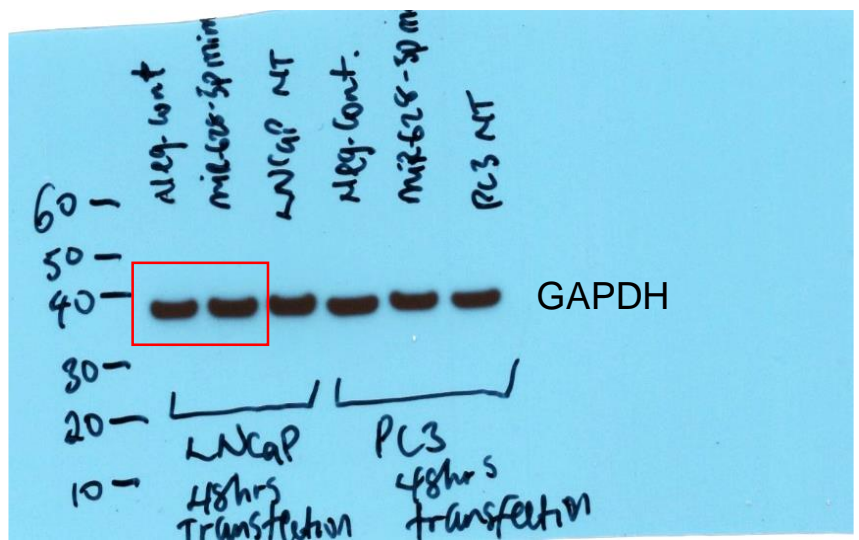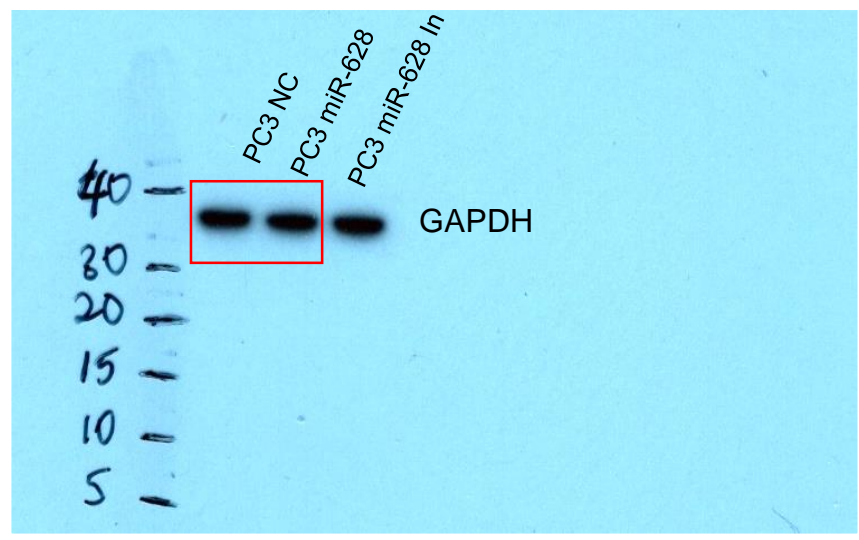

Full length images of blots for Fig. 5E in main paper. Red rectangles indicate the regions used in the figures. PVDF membranes were used for probing with the respective primary antibody. Film was utilized to develop membranes.

**Figure 5**

LNCaP- NC  
LNCaP- miR-628  
PC3- NC  
PC3- miR-628

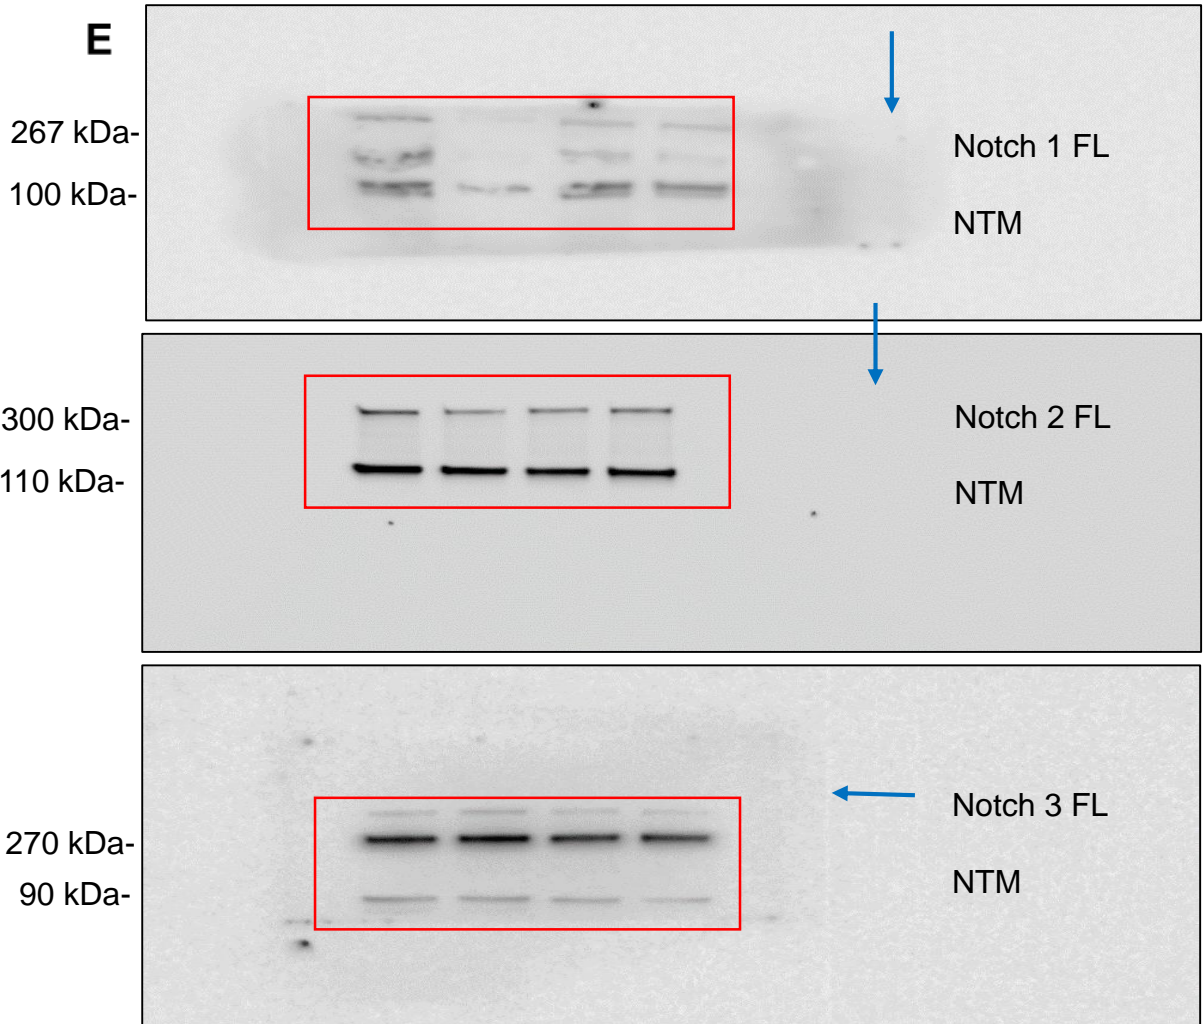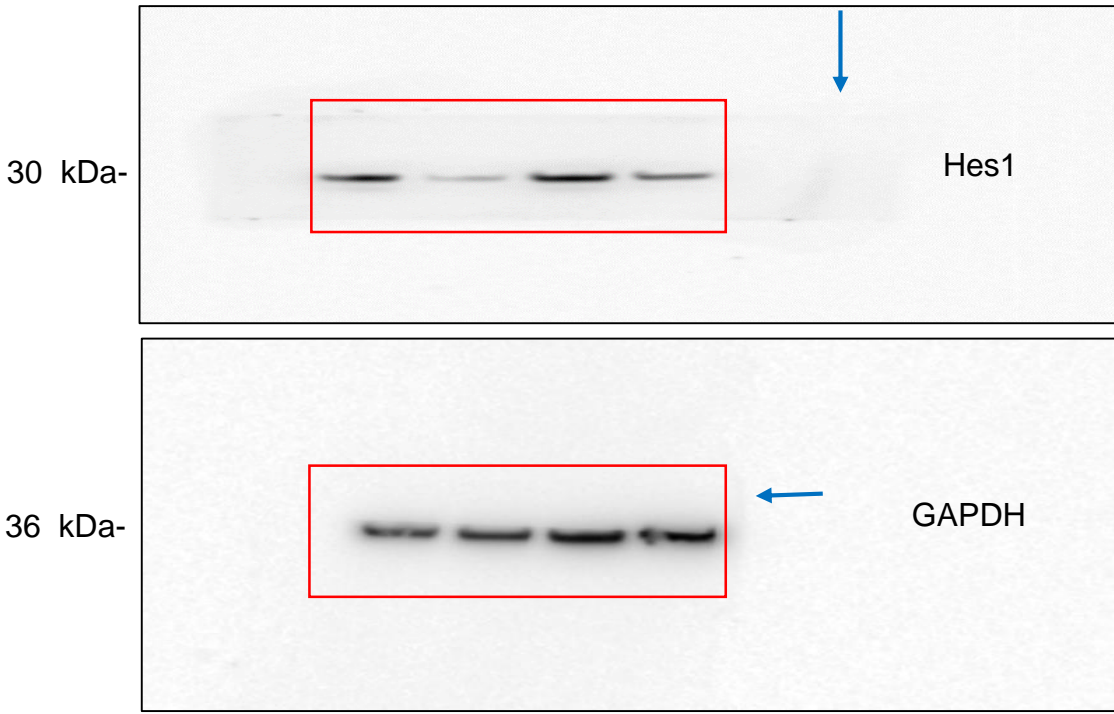

\*\* membrane was cut previous to probing using molecular weight marker as reference. The Azure c500 was used to scan membranes.

Full length images of blots for Fig. 5E in main paper. Red rectangles indicate the regions used in the figures. PVDF membranes were used for probing with the respective primary antibody.



Figure 5

F

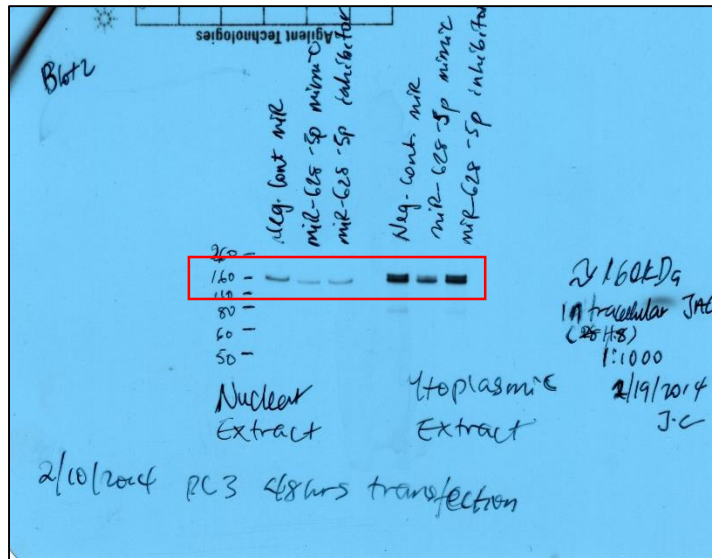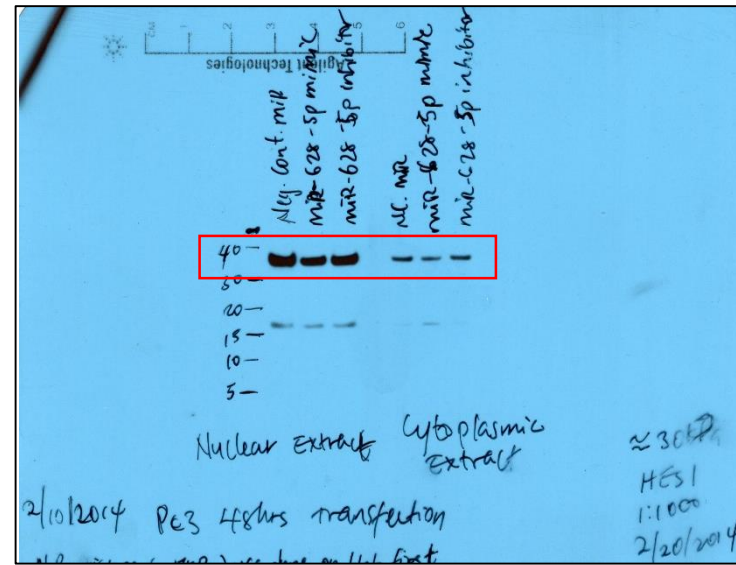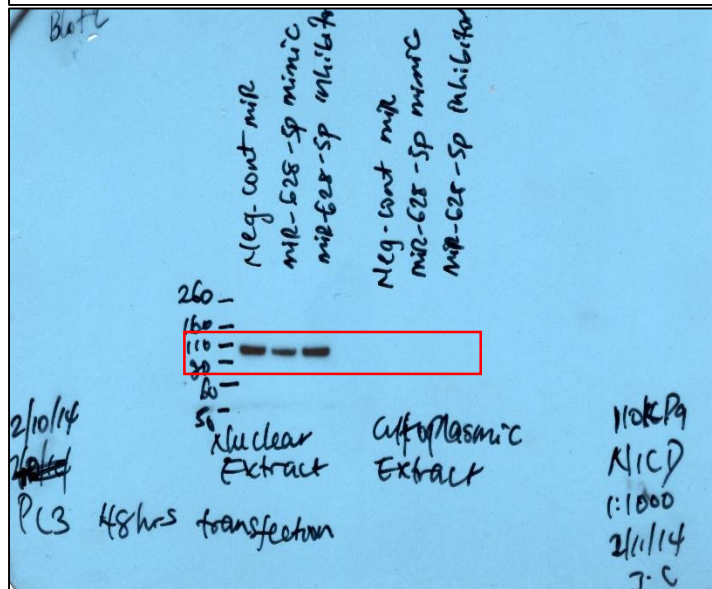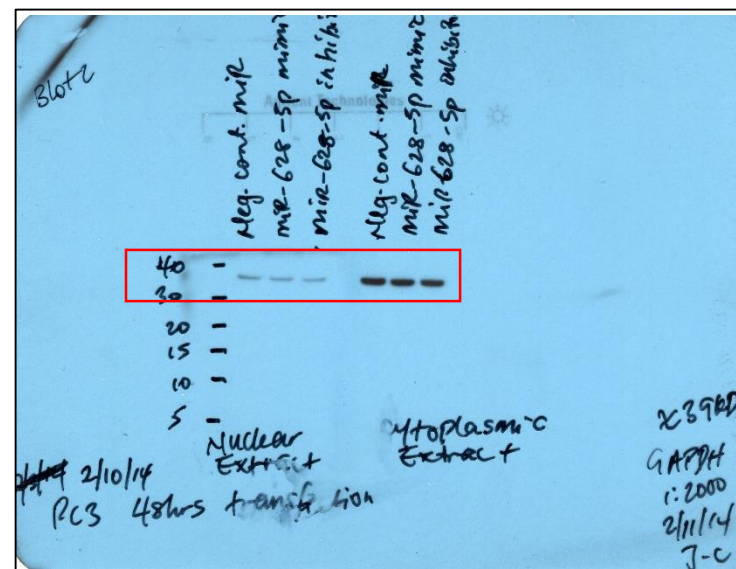

Full length images of blots for Fig. 5F in main paper. Red rectangles indicate the regions used in the figures. PVDF membranes were used for probing with the respective primary antibody. Film was utilized to develop membranes.

Figure 5

G

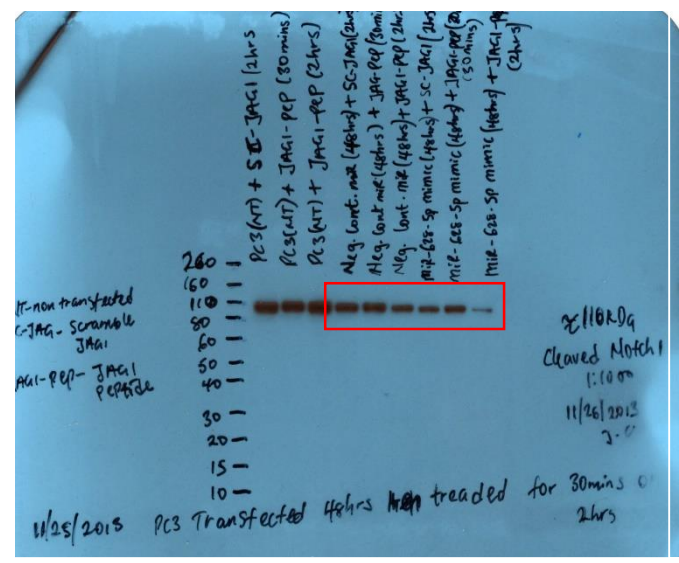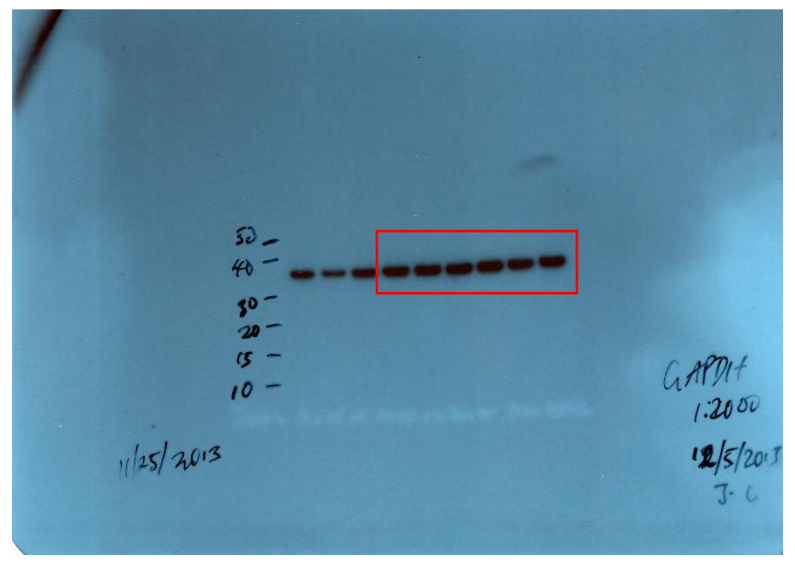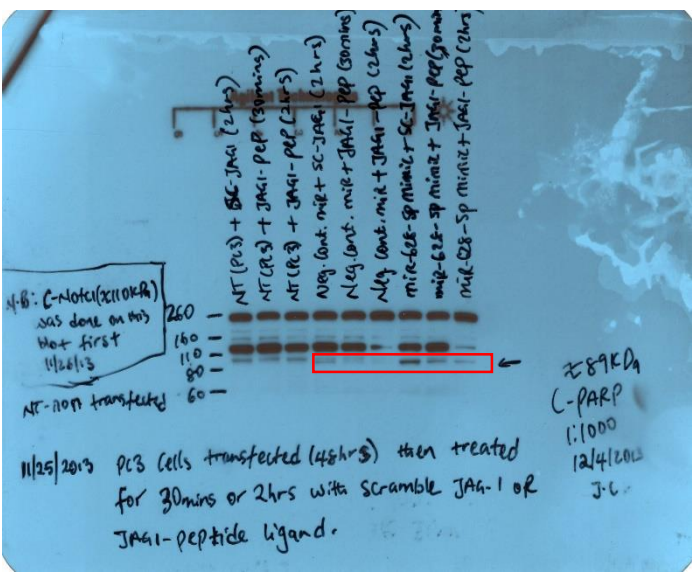

Full length images of blots for Fig. 5G in main paper. Red rectangles indicate the regions used in the figures. PVDF membranes were used for probing with the respective primary antibody. Film was utilized to develop membranes.

Figure 6

E

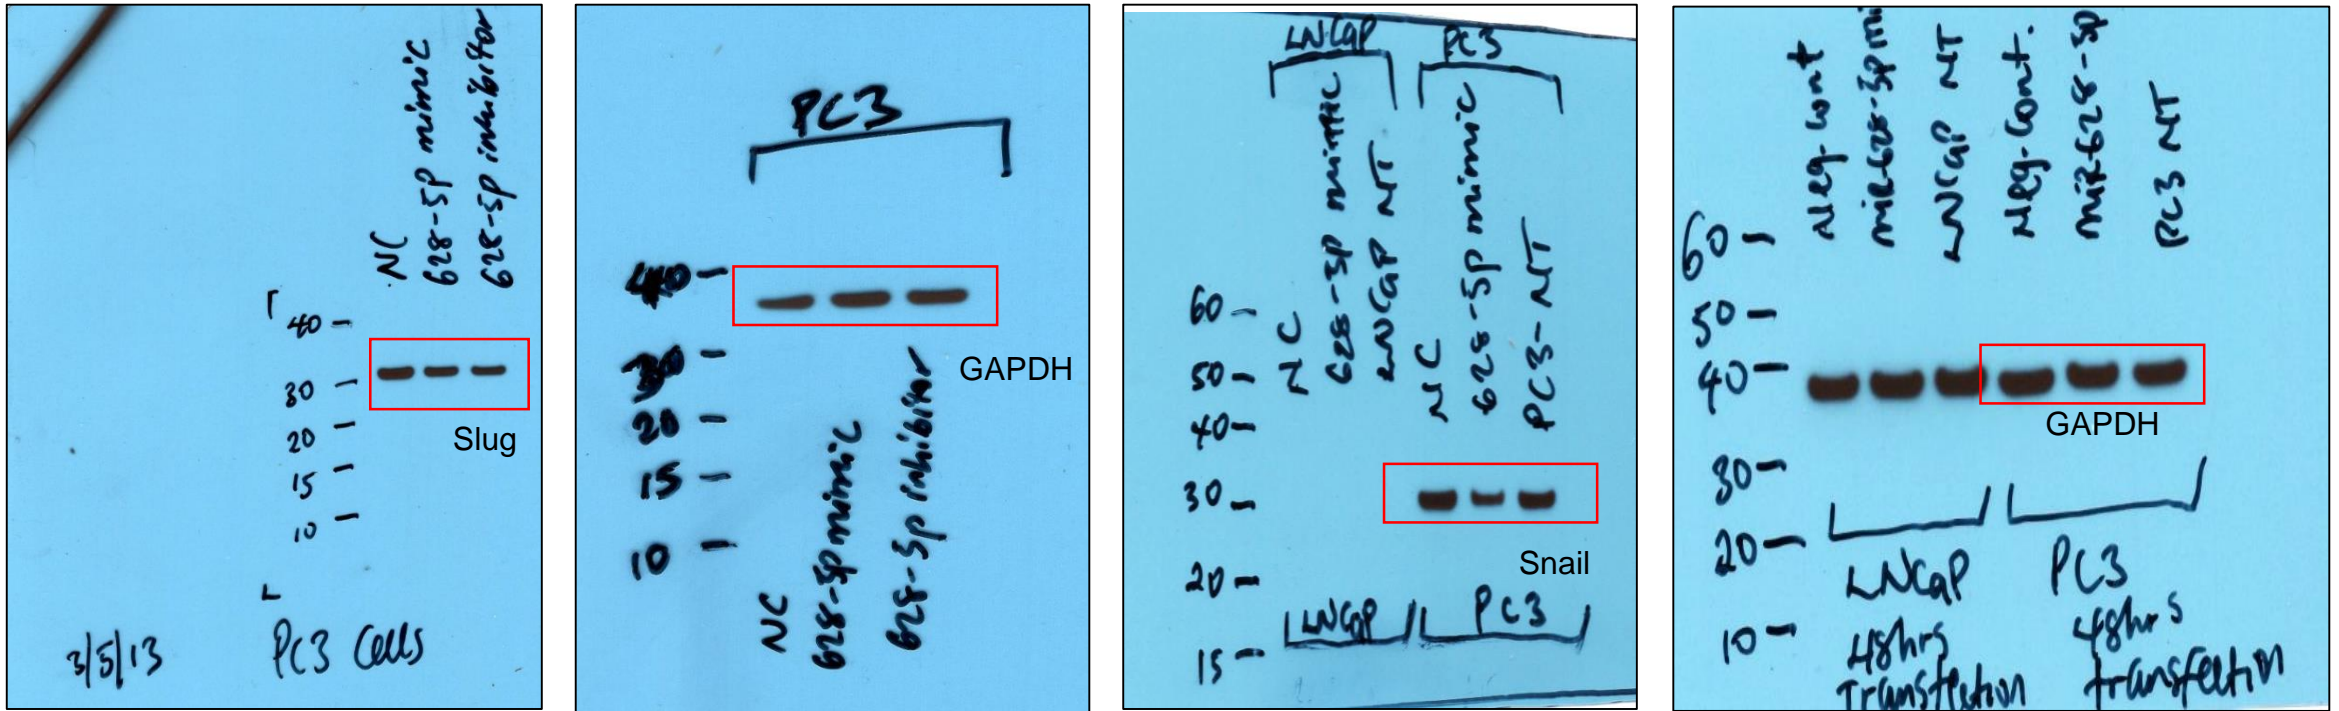

Full length images of blots for Fig. 6E in main paper. Red rectangles indicate the regions used in the figures. PVDF membranes were used for probing with the respective primary antibody. Film was utilized to develop membranes.



Figure 6

F

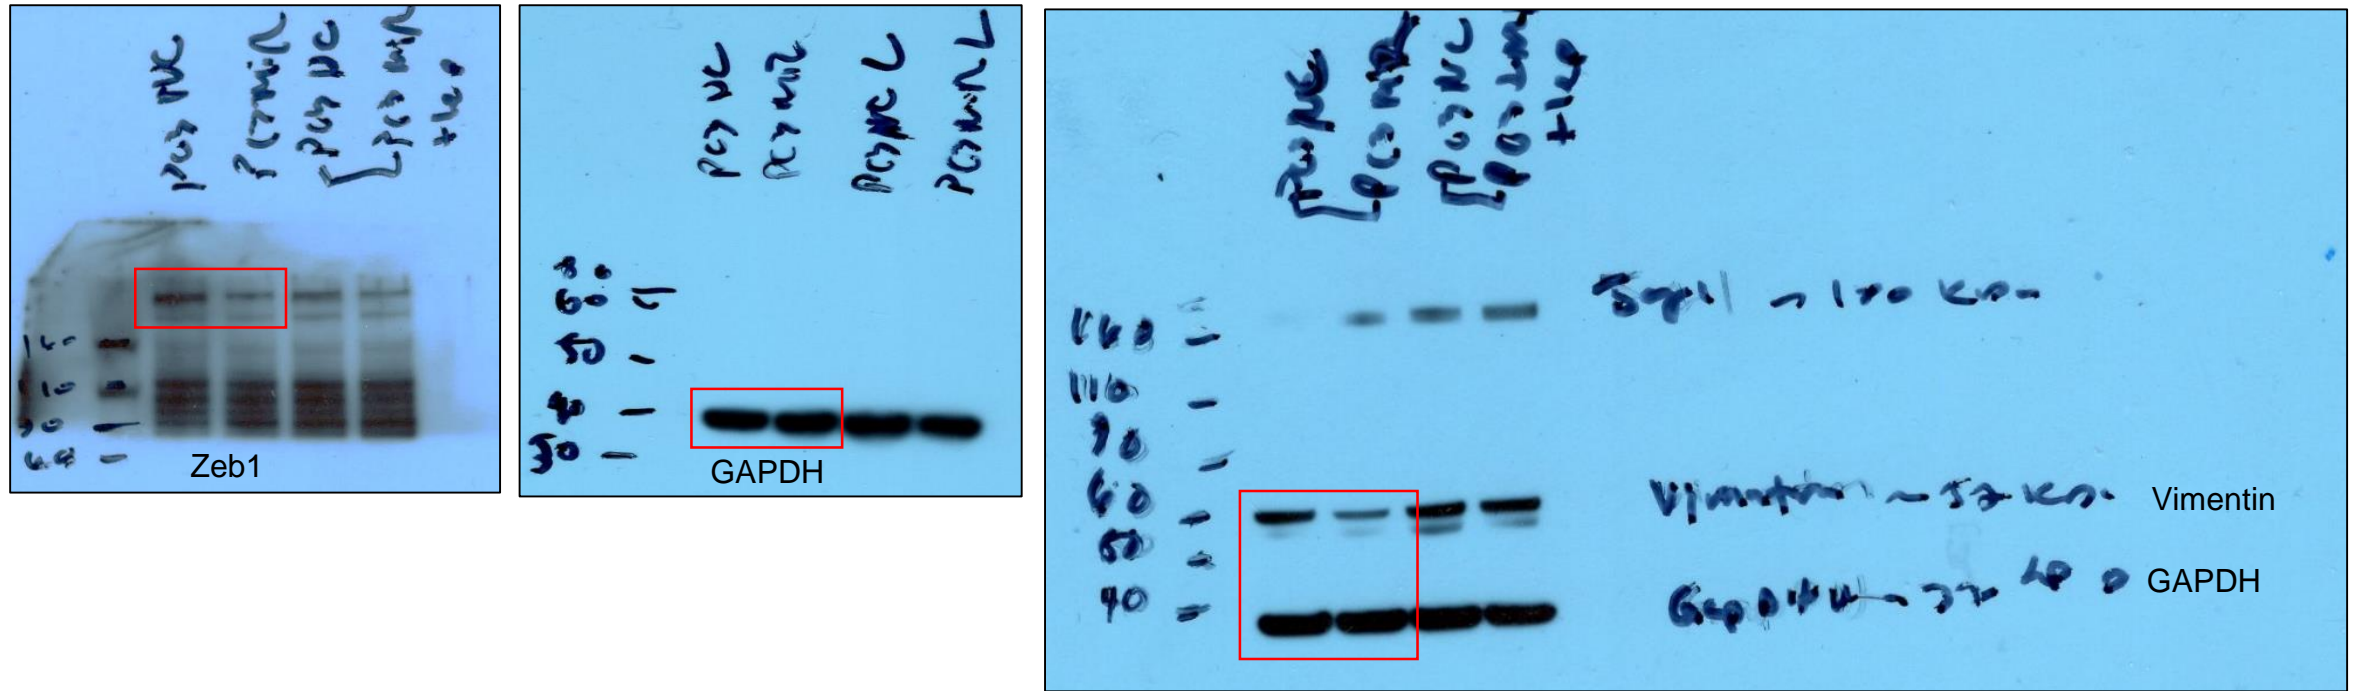

Full length images of blots for Fig. 6F in main paper. Red rectangles indicate the regions used in the figures. PVDF membranes were used for probing with the respective primary antibody. Film was utilized to develop membranes.

**Figure 6**

**H- left and right**

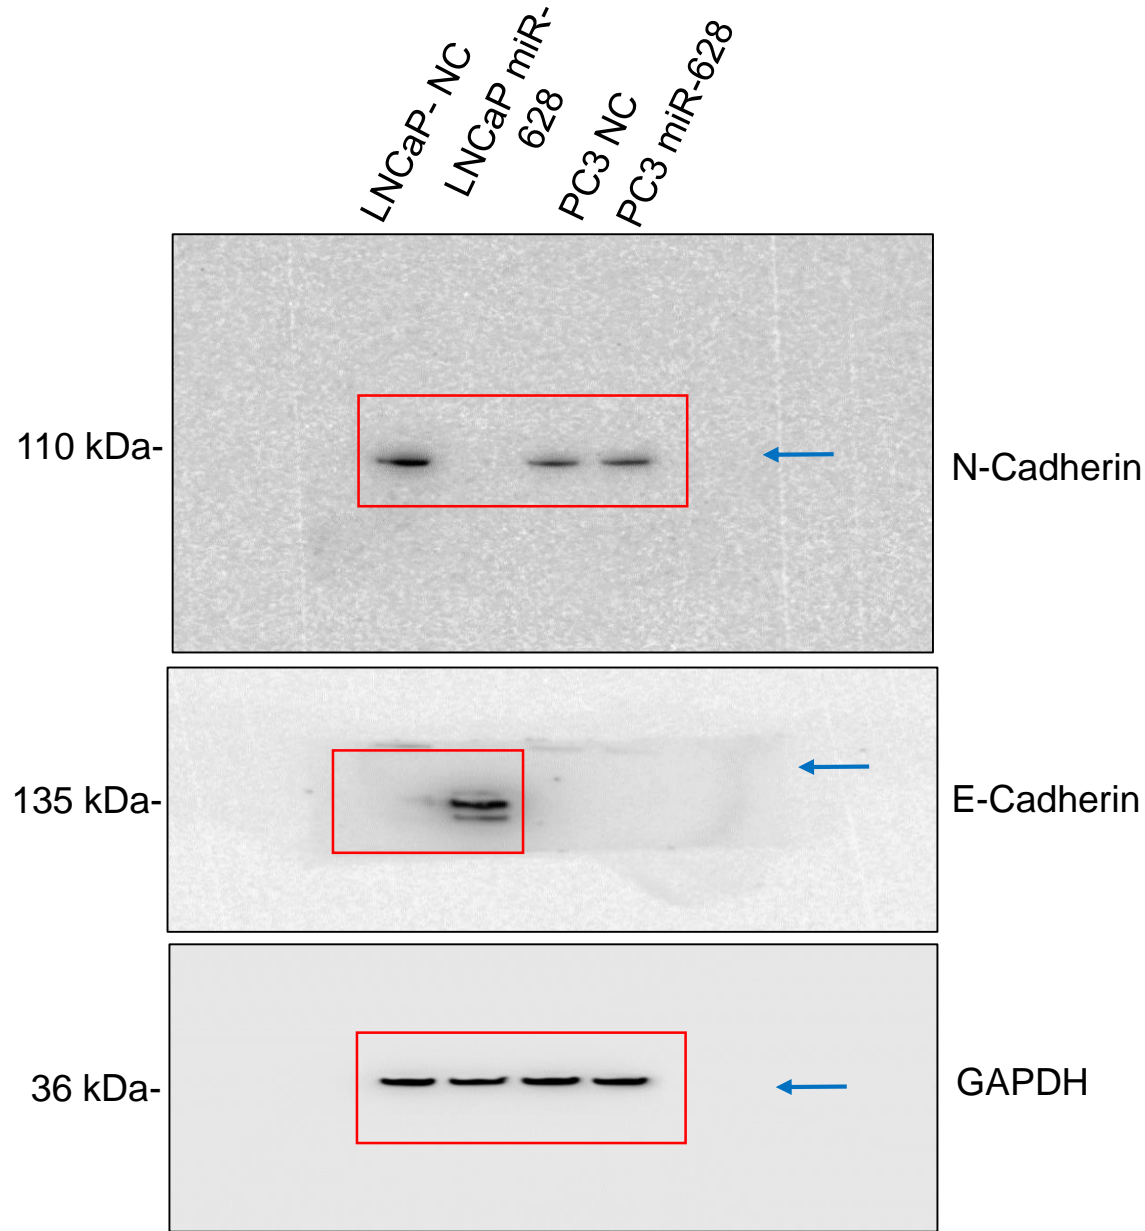

\*\* membrane was cut previous to probing using molecular weight marker as reference. The Azure c500 was used to scan membranes.

Full length images of blots for Fig. 6H in main paper. Red rectangles indicate the regions used in the figures. PVDF membranes were cut where indicated using molecular weight marker as reference, and used for probing with the respective primary antibody. The Azure c500 was used to scan membranes.

Figure 6

H-right

PC3 NT  
PC3 NC  
PC3 miR-628

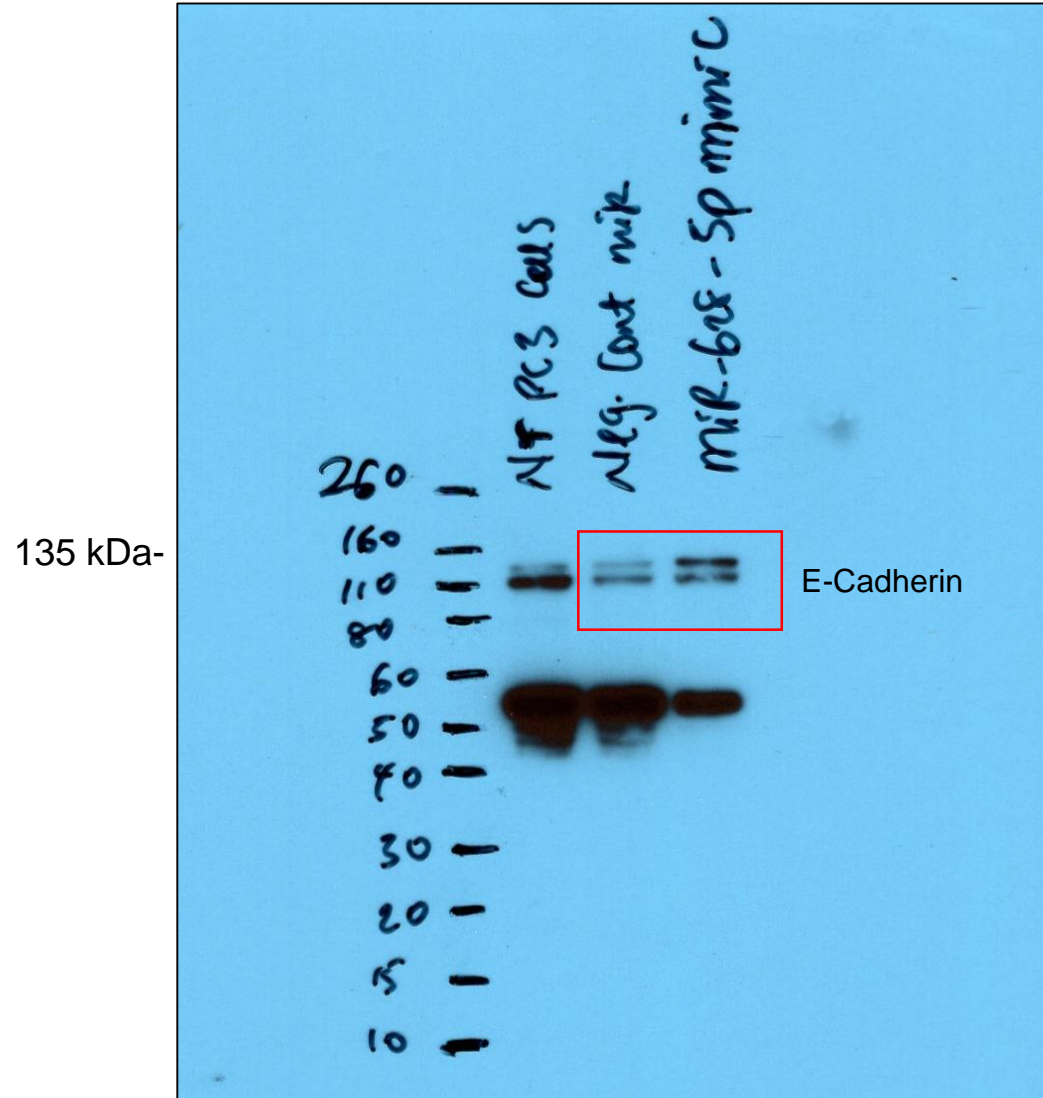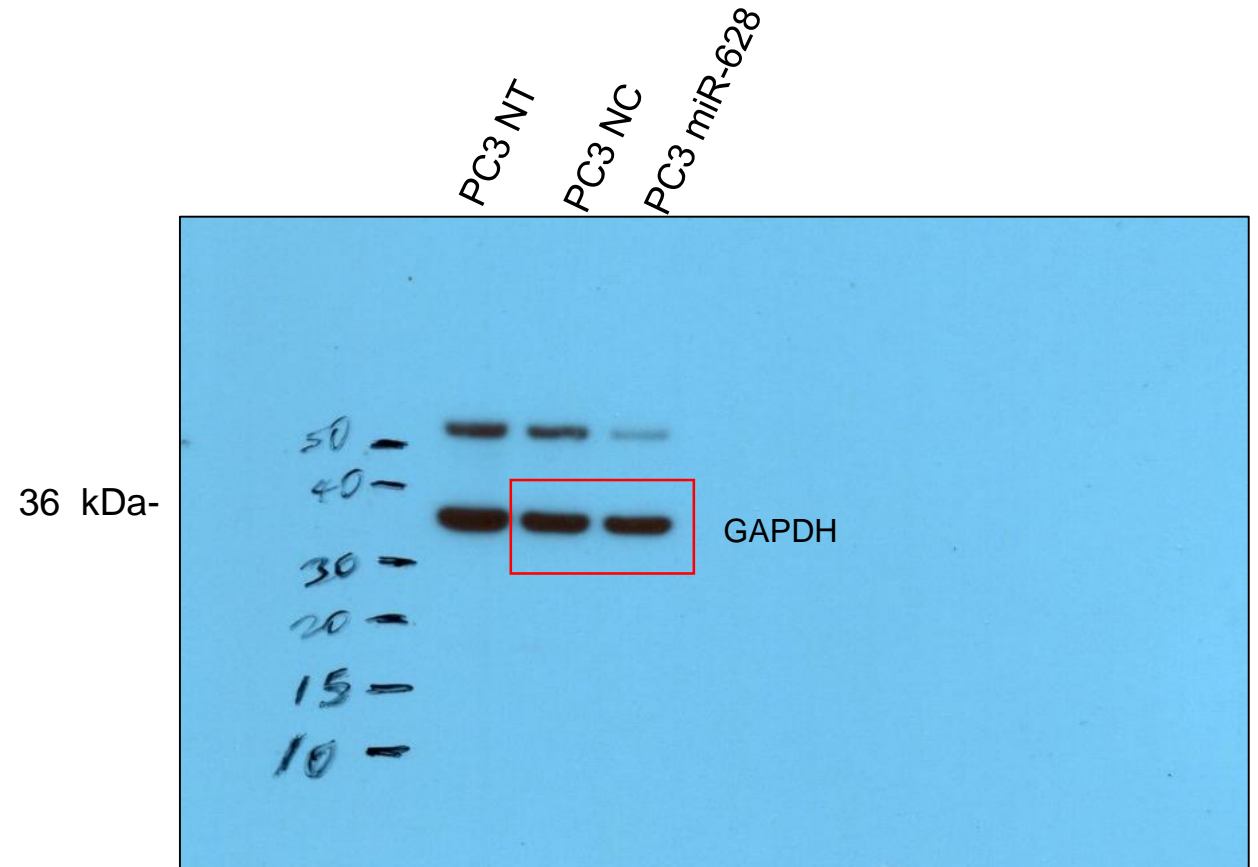

Full length images of blots for Fig. 6H in main paper. Red rectangles indicate the regions used in the figures. PVDF membranes were used for probing with the respective primary antibody. Film was utilized to develop membranes.
